# Supplementary material
Source: PubMed Central journal article supplement (PMC9292460)
Supplement: FSB2-33-6767-s001.pdf [file FSB2-33-6767-s001.pdf]

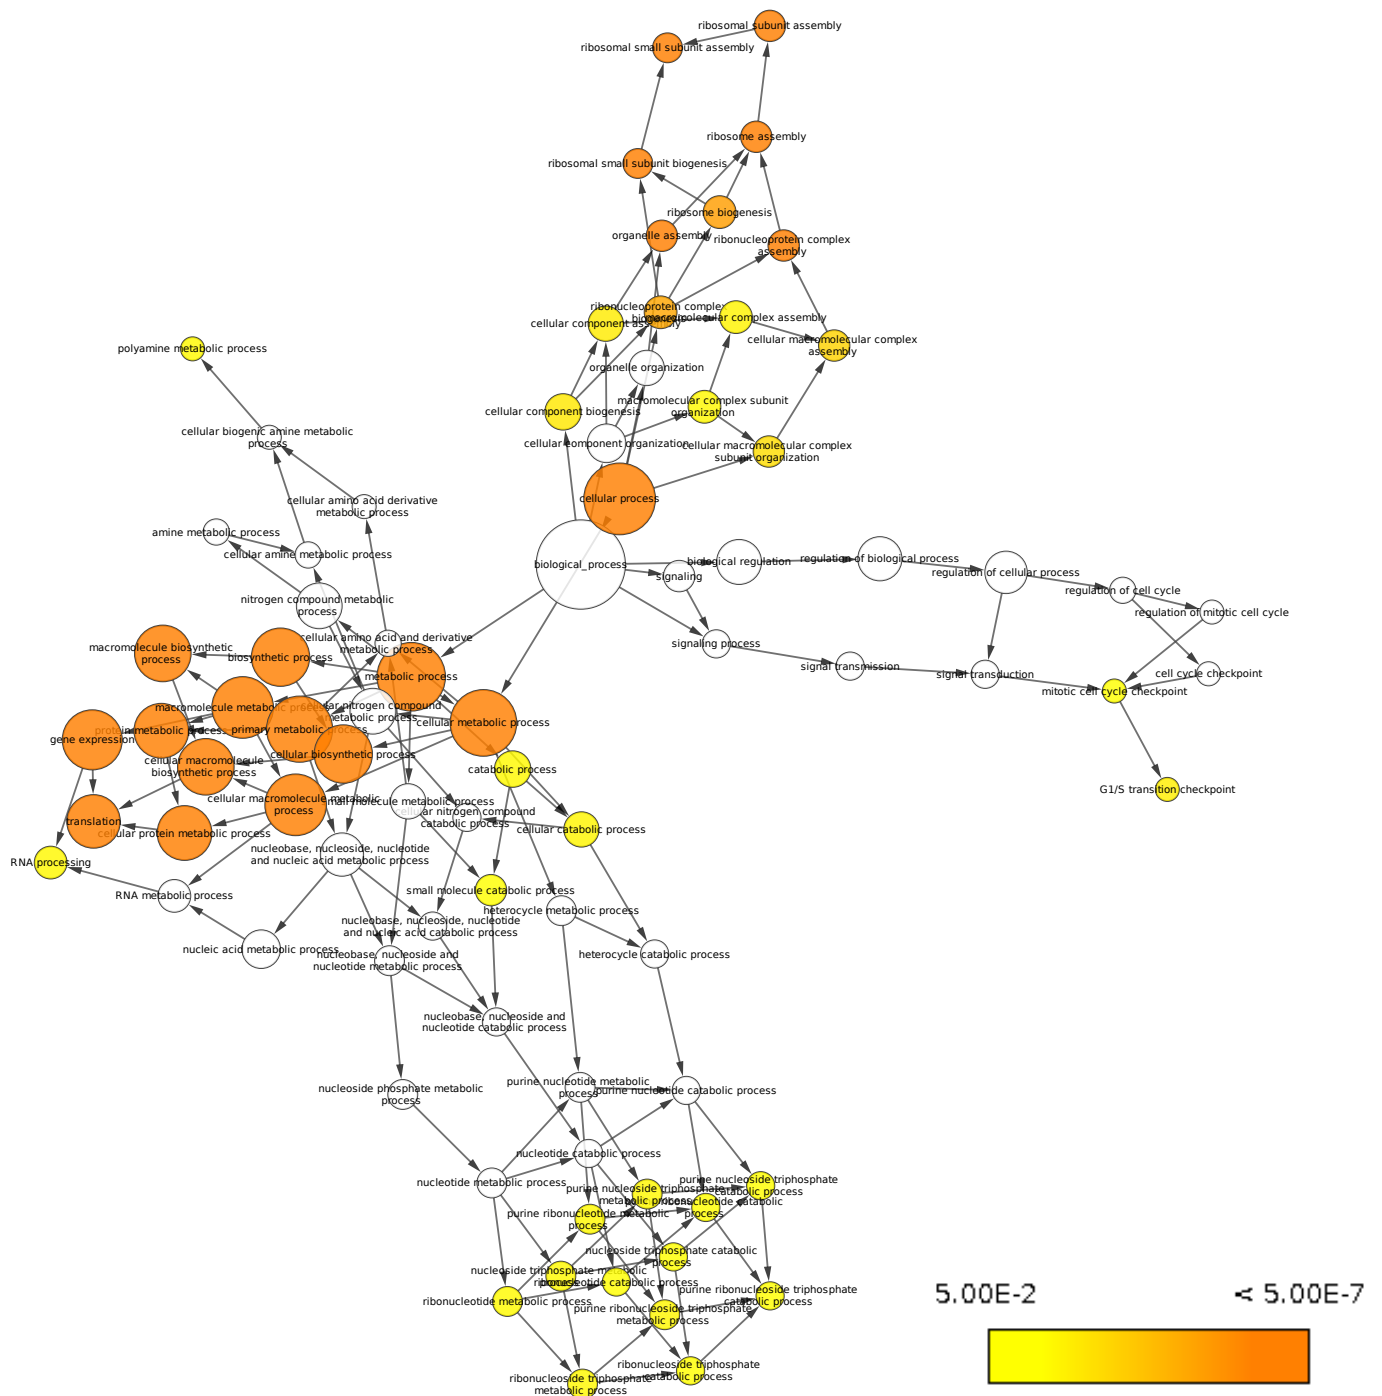

**Supplementary Figure 6. Gene ontology and associated pathway network analyses: upregulated pathways in hybrids relative to murine HL1cm.** Network analysis shows the upregulated GO pathways in the fusion products compared to the murine HL1cm. The size of the node denotes the number of genes included in the pathway. The yellow to orange color scale indicates significant pathways (Benjaminin-Hochberg corrected P value < 0.05), where orange color indicates higher significance.
