# Supplementary material
Source: PubMed Central journal article supplement (PMC9292460)
Supplement: FSB2-33-6767-s002.pdf [file FSB2-33-6767-s002.pdf]

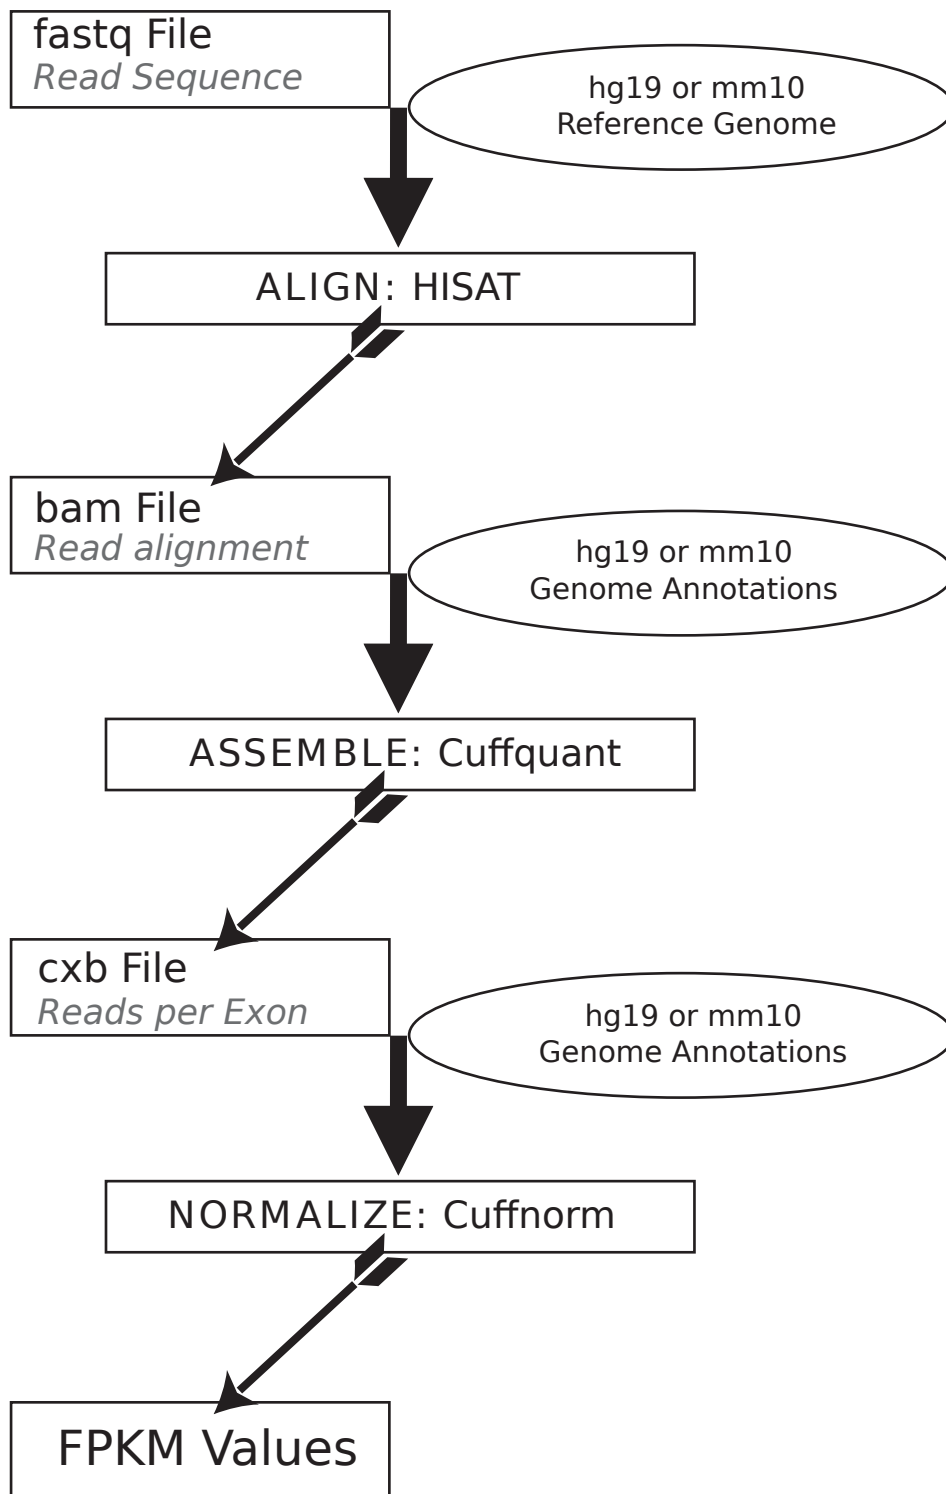

**Supplementary Figure 1. Workflow of the RNAseq analyses.** The raw fastq files were first aligned to either human (hg19) or mouse (mm10) genomes using HISAT. The output bam files were then assembled with CuffQuant. Finally the FPKM values were summarized and normalized using Cuffnorm.
