# Supplementary material
Source: PubMed Central journal article supplement (PMC9292460)
Supplement: FSB2-33-6767-s003.pdf [file FSB2-33-6767-s003.pdf]

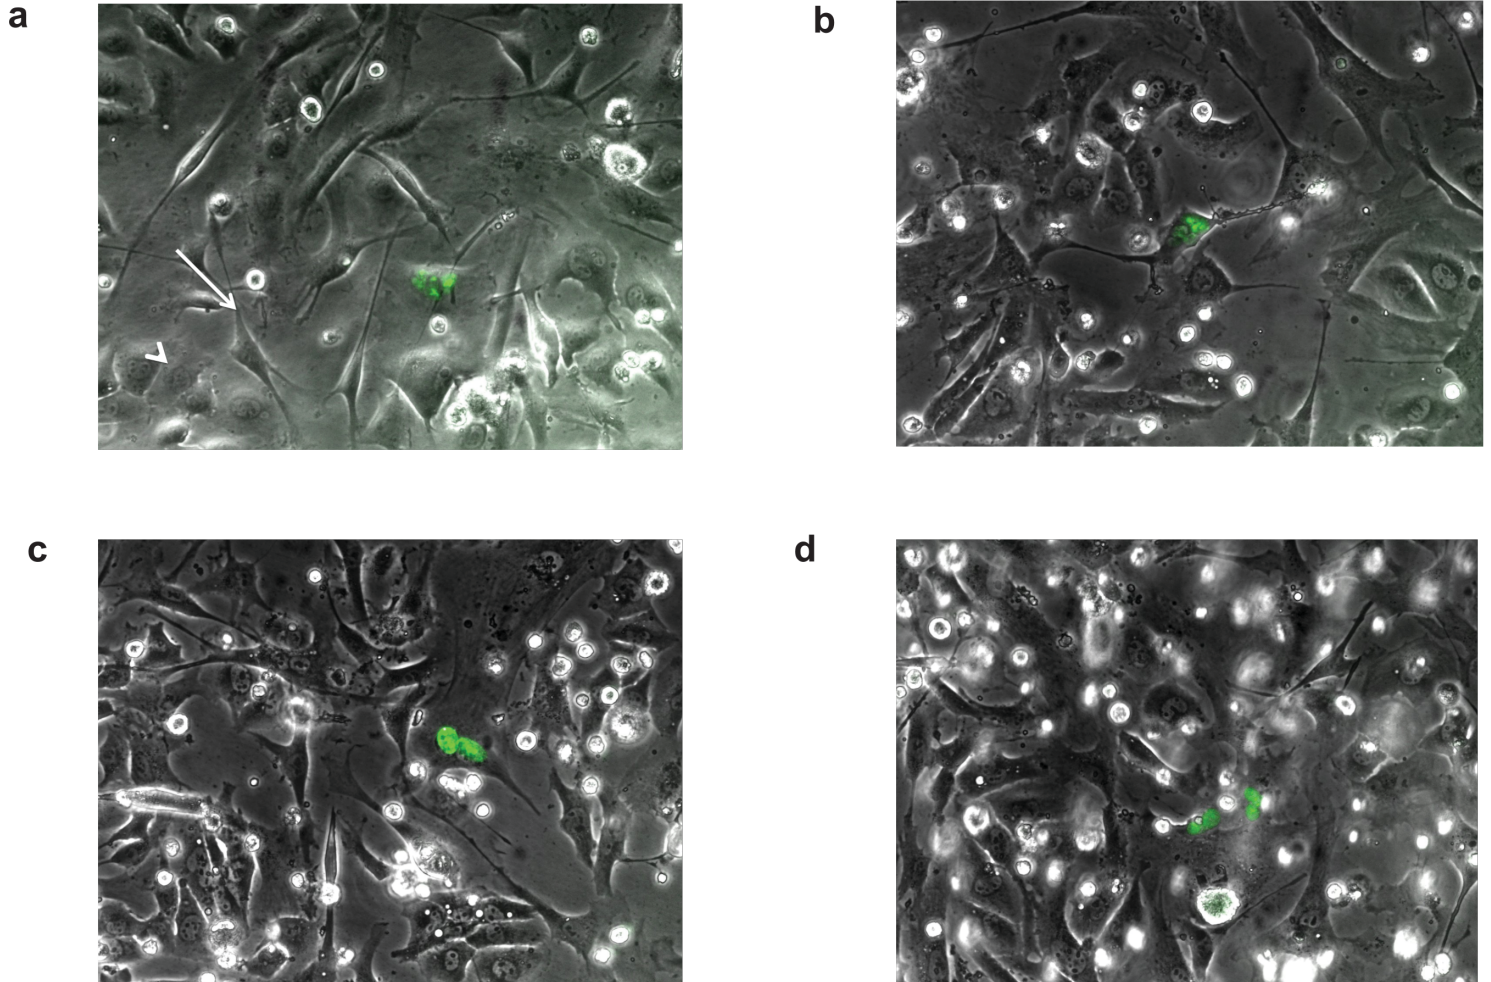

**Supplementary Figure 2. Identification and morphologic assessment of hybrid cells.** Hybrid cells were easily identified via vibrant green fluorescence in cell nuclei. For comparison of morphology to parental cells, see white arrow in panel a) for hMSC and white arrow head in panel a) for HL1cm. **a)** Hybrid in this panel is more HL1cm-like in morphology. **b)** Hybrid in this panel is more hMSC-like in morphology. **c, d)** Hybrids of these panels exhibit morphologies that are distinct from the parental lines.
