# Supplementary material
Source: PubMed Central journal article supplement (PMC9292460)
Supplement: FSB2-33-6767-s006.pdf [file FSB2-33-6767-s006.pdf]

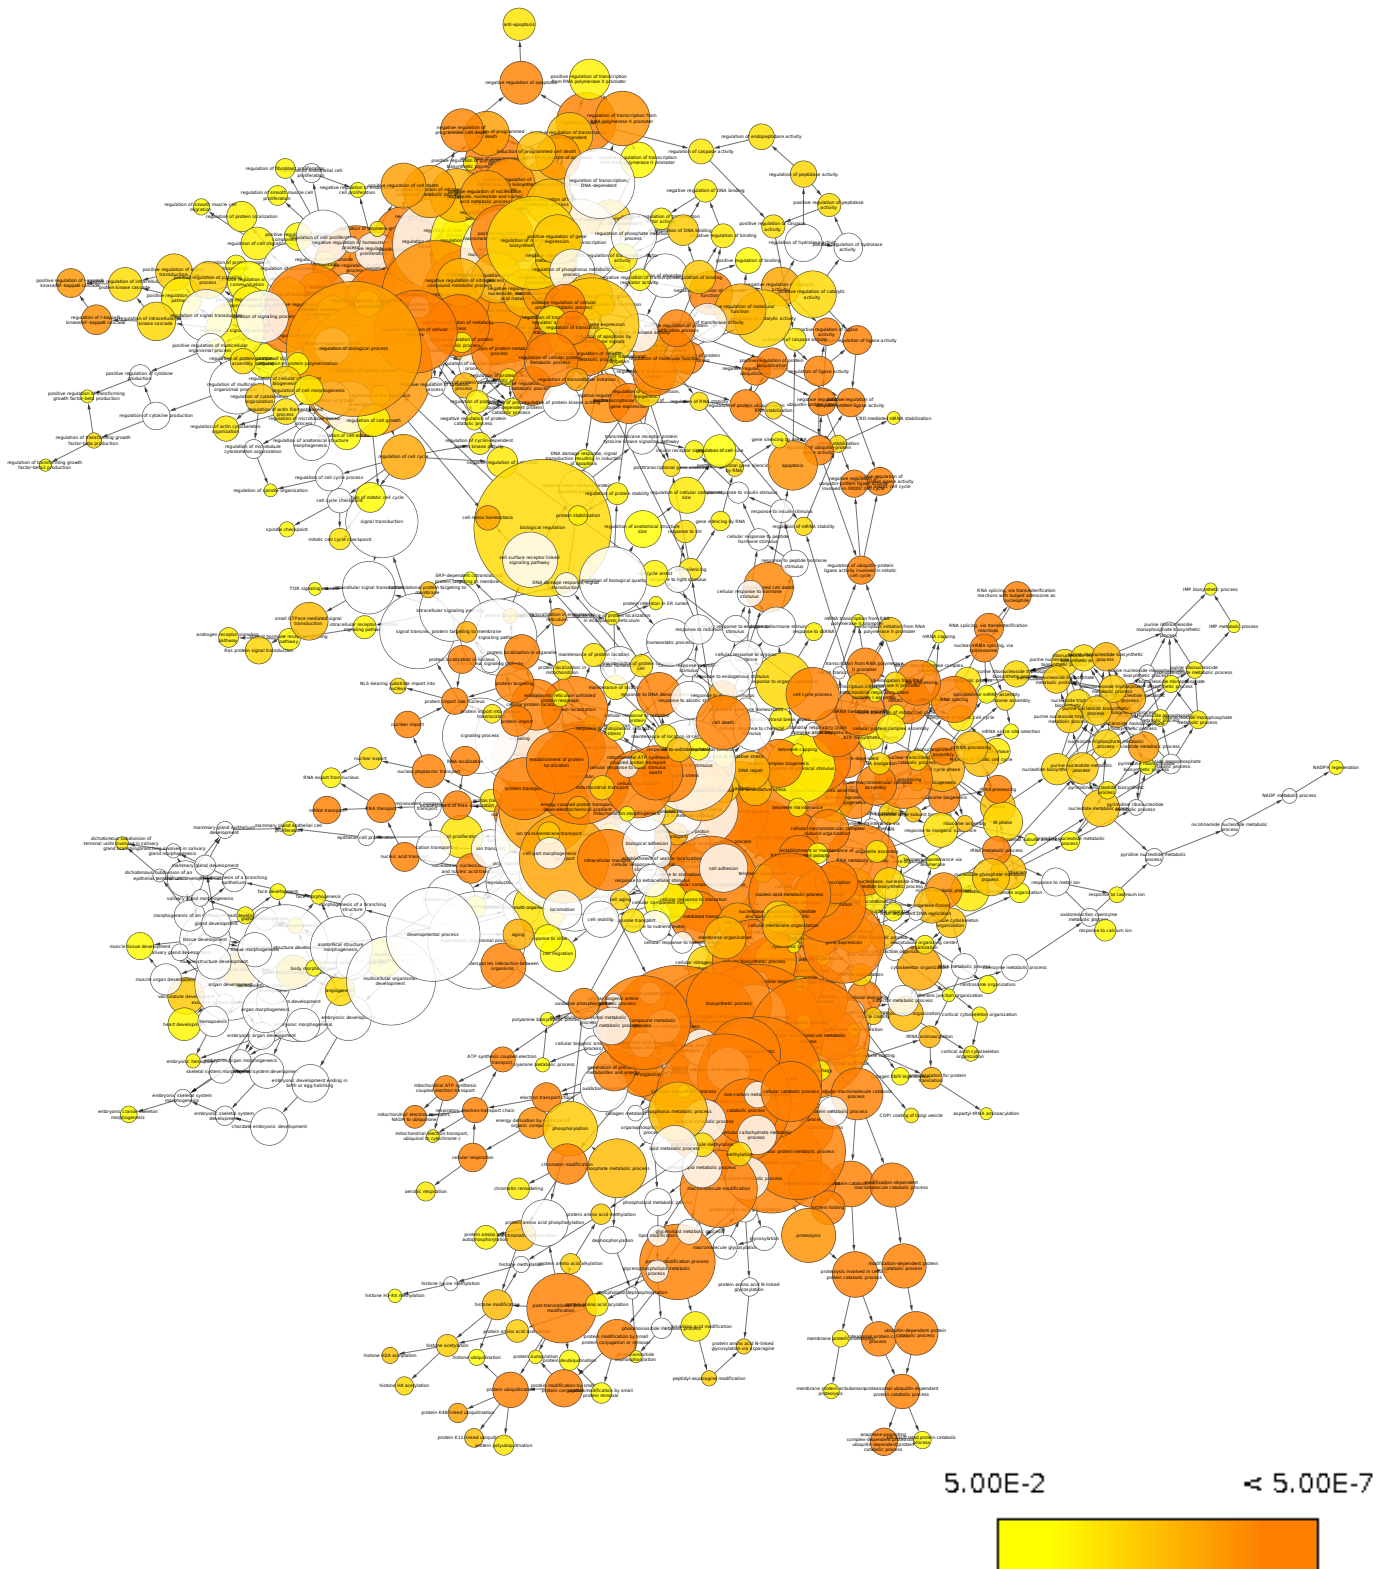

**Supplementary Figure 5. Gene ontology and associated pathway network analyses: downregulated pathways in hybrids relative to hMSCs.** Network analysis shows the downregulated GO pathways in the fusion products compared to the hMSCs. The size of the node denotes the number of genes included in the pathway. The yellow to orange color scale indicates significant pathways (Benjamini-Hochberg corrected P value < 0.05), where orange color indicates higher significance.
