# Supplementary material
Source: PubMed Central journal article supplement (PMC9292460)
Supplement: FSB2-33-6767-s008.pdf [file FSB2-33-6767-s008.pdf]

**a**

**b**

**Supplementary Figure 9. GH1 protein expression in supernatant of hMSC-HL1cm co-cultures.**

hMSCs and HL-1cms were cocultured in 6 well plates for 18 hours and then supernatant of 3 wells were pooled and concentrated using vacuum centrifugation to 100  $\mu$ l. The entire volume was applied to a well of an ELISA plate with care to ensure separation from standard controls. **a)** Standard curve for GH1
