# Supplementary material
Source: PubMed Central journal article supplement (PMC9292460)
Supplement: FSB2-33-6767-s009.pdf [file FSB2-33-6767-s009.pdf]

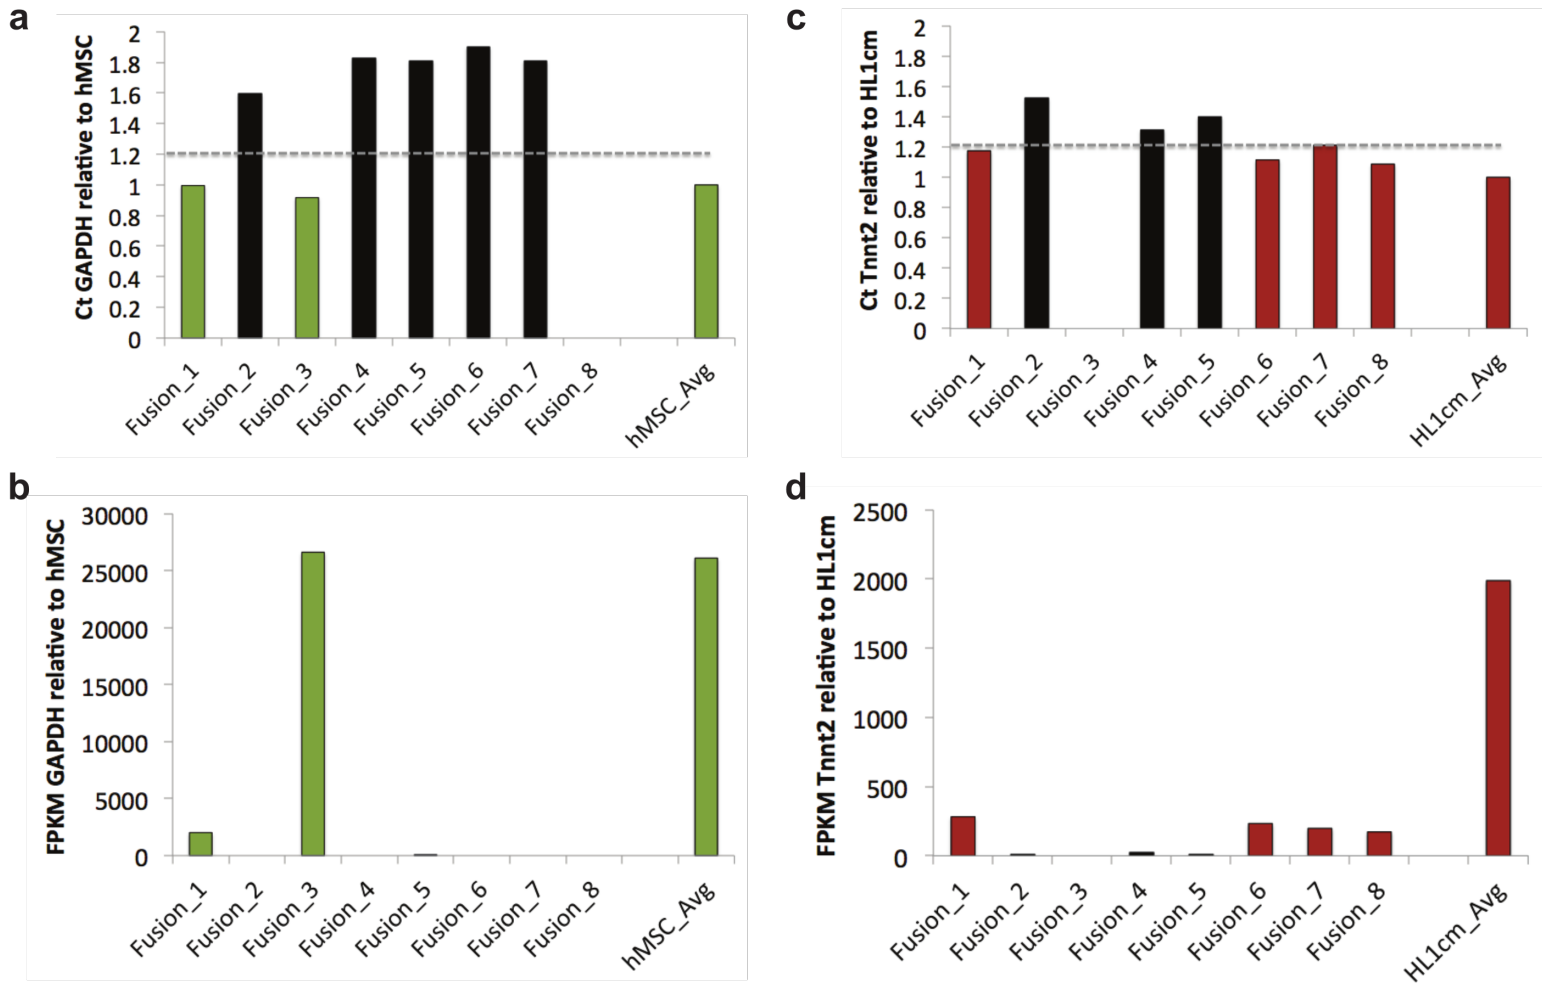

**Supplementary Figure 8. Validation of scRNA-Seq via qRT-PCR.** cDNA of individual fusion products and associated controls were probed for human-specific GAPDH and murine-specific cTnt2 via real time, reverse transcriptase polymerase chain reaction. **a)** Ct values for each fusion product relative to hMSC control for human GAPDH; dashed line represents visual threshold indicative of expression above background levels. Thus those fusion products below the threshold, but above zero, express human GAPDH and so are designated with green color column. **b)** Corresponding FPKM values for human GAPDH for each fusion product. **c)** Ct values for each fusion product relative to HL1cm control for murine cTnt2; dashed line represents visual threshold indicative of expression above background levels. Thus those fusion products below the threshold, but above zero, express murine cTnt2 and so are designated with red color column. **d)** Corresponding FPKM values for cTnt2 for each fusion product.
